# Supplementary material
Source: MDPI journal article supplement (https://www.mdpi.com/2079-6412/12/4/462)
Supplement: s1 [file s1 › coatings-1629197 supplementary revised.pdf]

# Supplementary Materials: Application and Monitoring of Oxidative Alginate–Biocide Hydrogels for Two Case Studies in “The Sassi and the Park of the Rupestrian Churches of Matera”

Francesco Gabriele <sup>1</sup>, Laura Bruno <sup>2</sup>, Cinzia Casieri <sup>1</sup>, Roberta Ranaldi <sup>2</sup>, Lorenza Rugnini <sup>2</sup> and Nicoletta Spreti <sup>1,\*</sup>

<sup>1</sup> Department of Physical and Chemical Sciences, University of L’Aquila, Via Vetoio—Coppito, I-67100 L’Aquila, Italy; francesco.gabriele@graduate.univaq.it (F.G.); cinzia.casieri@aquila.infn.it (C.C.)

<sup>2</sup> LBA—Laboratory of Biology of Algae, Department of Biology, University of Rome “Tor Vergata”, Via Cracovia 1, I-00133 Rome, Italy; laura.bruno@uniroma2.it (L.B.); ranaldi.roberta@gmail.com (R.R.); lorenza.rugnini@uniroma2.it (L.R.)

\* Correspondence: nicoletta.spreti@univaq.it

## Characterization of Biocidal Hydrogels

Alginate-based hydrogels were characterized through viscometry, FTIR-ATR spectroscopy and differential scanning calorimetry (DSC). All measurements were performed in triplicate on pure alginate hydrogel (HY), 5 wt.% of sodium alginate crosslinked with 0.3% CaCl<sub>2</sub> and on the biocidal hydrogels BH\_1 (hydrogel containing calcium hypochlorite) and BH\_2 (hydrogel containing sodium dichloroisocyanurate).

*Viscometry measurements.* The relative viscosities of alginate hydrogels were measured using a Viscolead rotational viscometer (mod. ADV “L”, Fungilab, Barcelona, Spain). Viscosity of the hydrogels was measured at 25 °C by setting the rotational speed at 5 rpm and the recorded values were reported in Table S1.

*FTIR-ATR spectra.* The IR spectrum were acquired using a FTIR Spectrum Two (Perkin-Elmer, Waltham, MA, USA) equipped with a UATR module at room temperature in a scan range between 4000 and 450 cm<sup>−1</sup>, with 4 accumulations and at a resolution of 4 cm<sup>−1</sup>. Infrared spectra of alginates allow to estimate the M/G values by means of the ratio between the maximum intensity of the absorption bands centered at 1030 and 1080 cm<sup>−1</sup> (A<sub>1030</sub>/A<sub>1080</sub>); these two bands are typical of the mannuronate (C–O–H bending) and guluronate (C–O–C stretching) subunit respectively [1,2]. The IR spectra were reported in Figure S1(A), the extrapolated M/G ratios for HY, BH\_1 and BH\_2 were listed in Table S1. All the M/G ratios resulted higher than that of the sodium alginate powder (1.7).

*Water content.* The water content of the three hydrogels were determined by weighing according to:

$$WC = \frac{W_w}{W_{HG}} \quad (1)$$

Where W<sub>w</sub> is the mass of water added in the hydrogel and W<sub>HG</sub> represent the mass of the hydrogels prepared with dry constituents [3]. The resulting values of WC were reported below in Table S1.

*Thermal analysis.* The thermal analyses were performed using a DSC 3 (Mettler Toledo, Schwerzenbach, Switzerland) differential scanning calorimeter. The hydrogels were placed in aluminum pans and the thermograms were acquired between −40 °C and +40 °C with a heating rate of 10 °C/min under a nitrogen atmosphere with a flow rate of 50 mL/min. The free water index (FWI), i.e., the fraction of water that exhibits bulk behavior in the gel medium, can be calculated as [4]:

$$FWI = \frac{\Delta H_{exp}}{\Delta H_{melt} \cdot WC} \quad (2)$$

Where  $\Delta H_{\text{exp}}$  is the experimental enthalpy of the melting transition (J/g),  $\Delta H_{\text{melt}}$  is the theoretical melting enthalpy of water (333.61 J/g). FWI data were reported in Table S1 and thermograms were showed in Figure S1 (B).

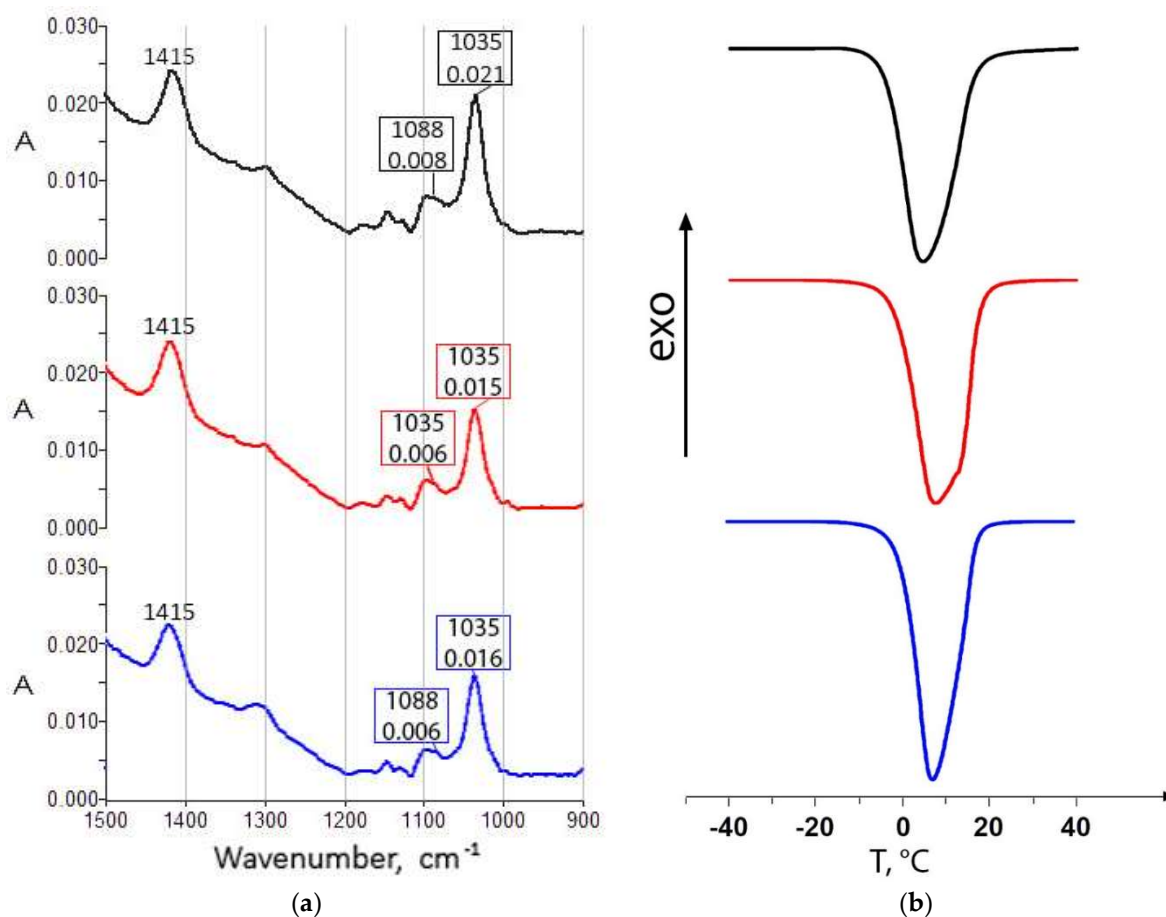

**Figure S1.** (A) FTIR-ATR spectra in the region comprise between 1500 and 900  $\text{cm}^{-1}$  and (B) DSC thermograms of 5 wt.% alginate hydrogel (—), BH\_1 (—) and BH\_2 (—).

**Table S1.** Summary of the investigated properties of pure alginate hydrogel (HY) and biocidal gels containing calcium hypochlorite (BH\_1) and sodium dichloroisocyanurate (BH\_2).

| Sample | $\eta, P$ | M/G | WC   | FWI  |
|--------|-----------|-----|------|------|
| HY     | 1036      | 2.6 | 0.95 | 0.86 |
| BH_1   | 662       | 2.5 | 0.94 | 0.91 |
| BH_2   | 916       | 2.7 | 0.94 | 0.92 |

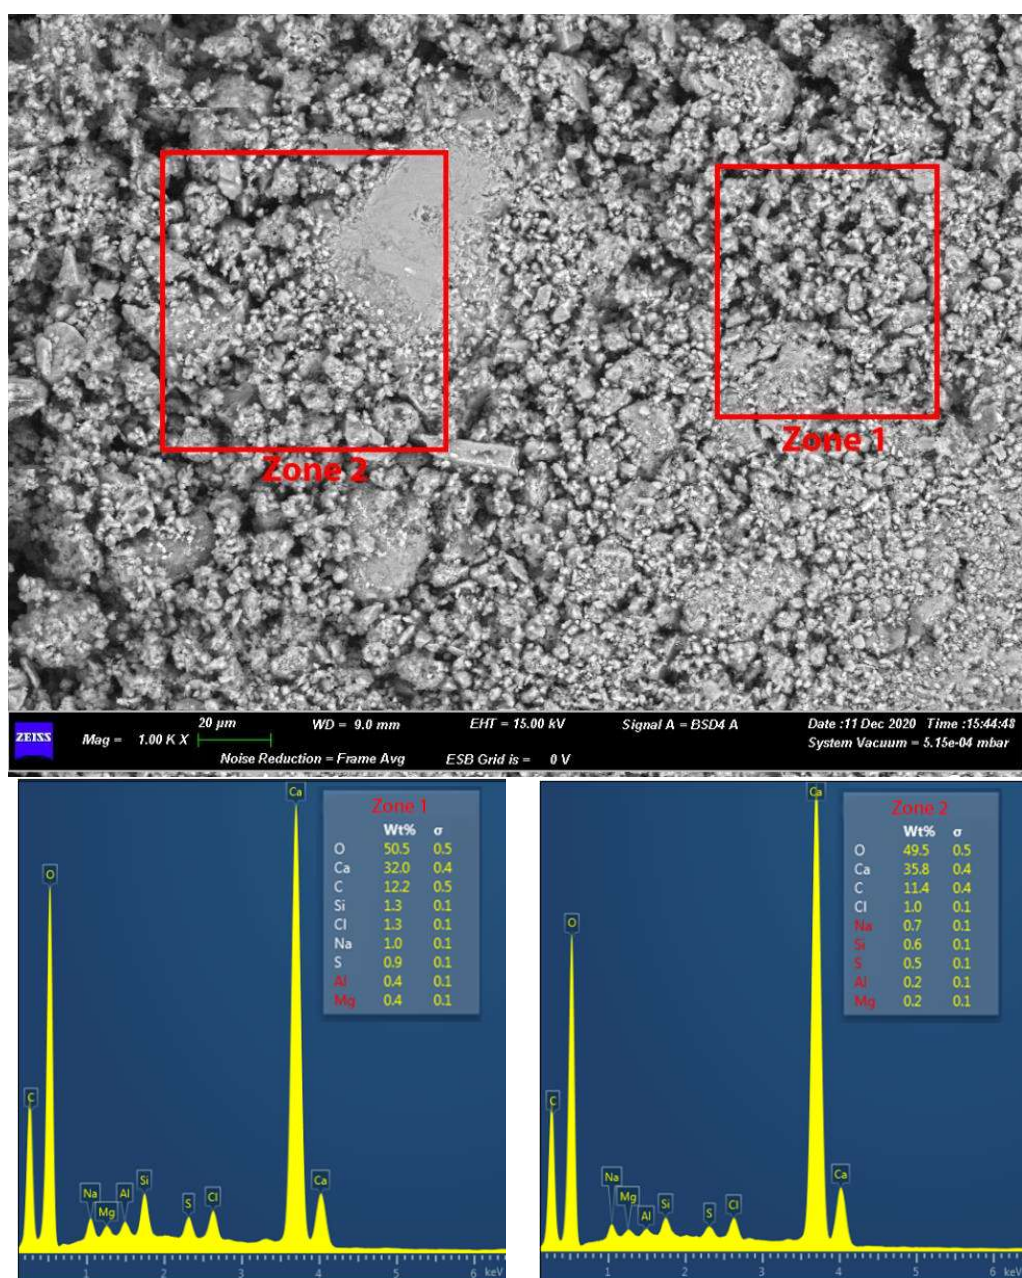

**Figure S2.** SEM images of reference stone materials fragments collected inside the Church of the “Madonna dei Derelitti” and EDS analysis of two selected areas.

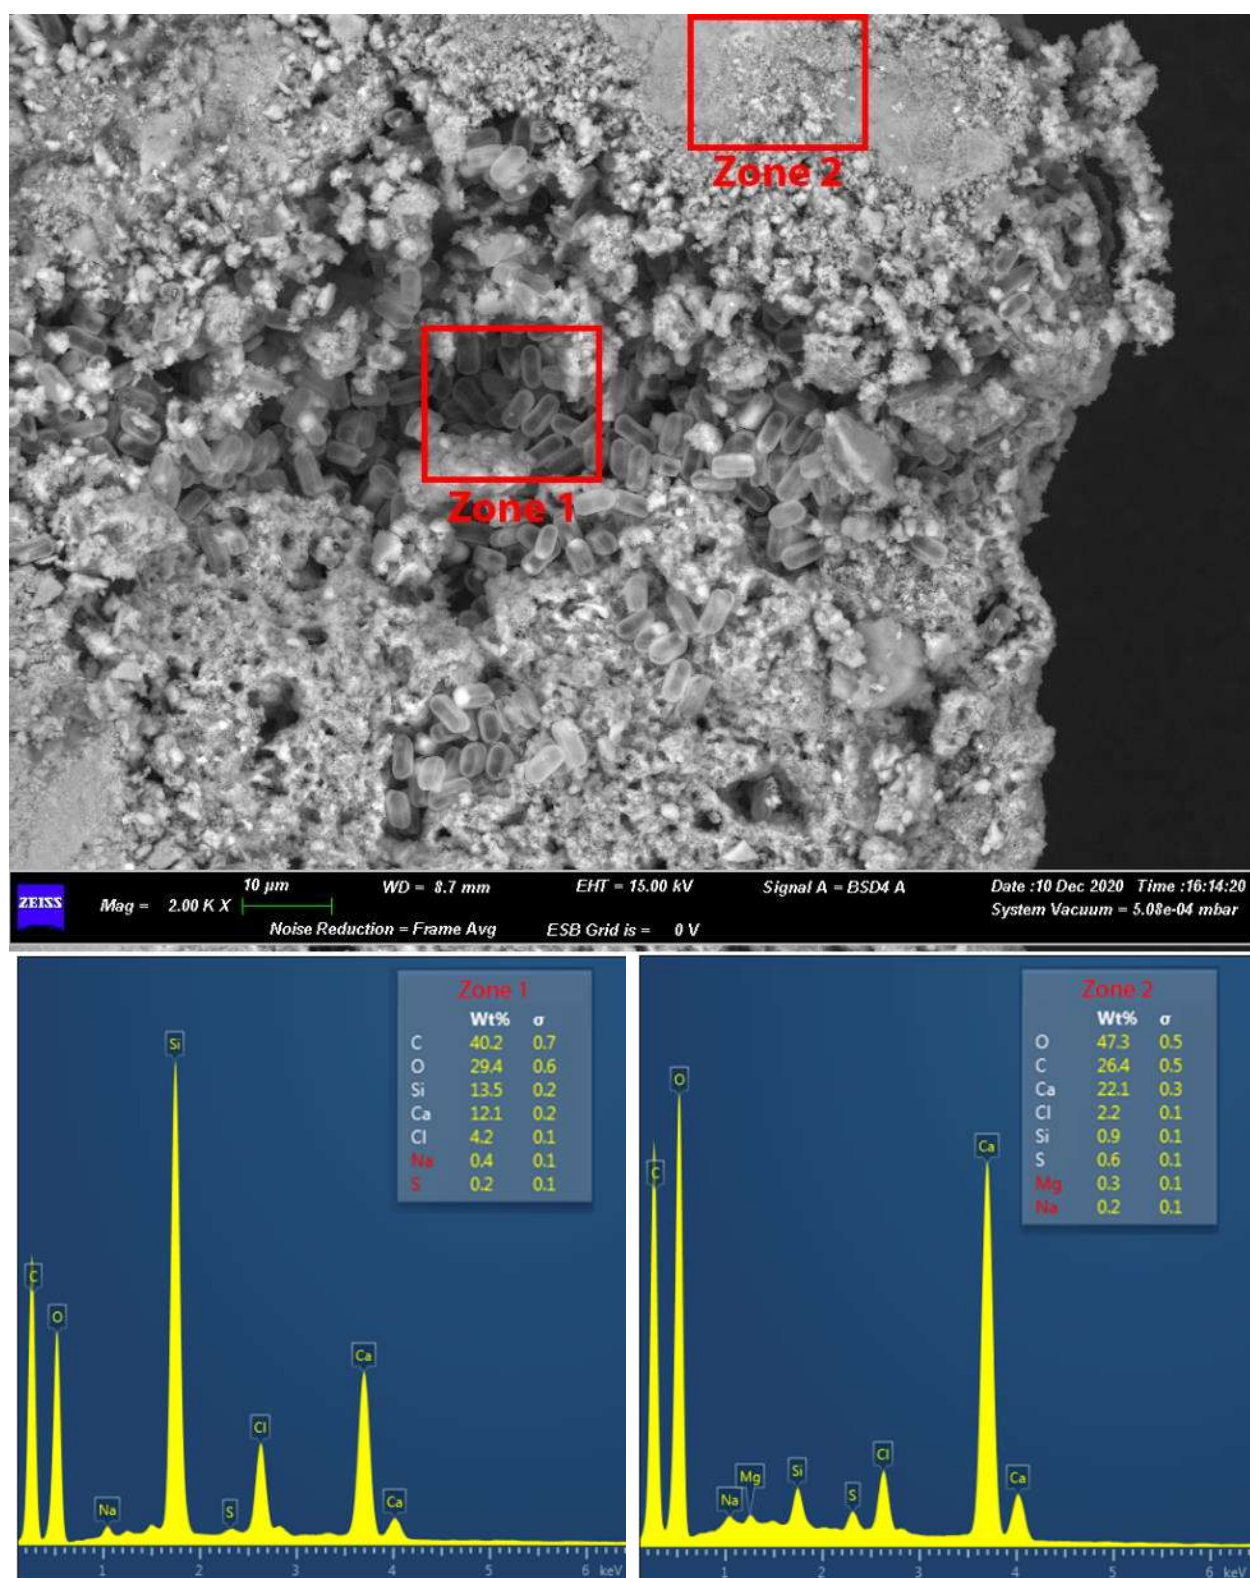

**Figure S3.** SEM images of colonized stone materials fragments collected inside the Church of the “Madonna dei Derelitti” and EDS analysis of two selected areas.

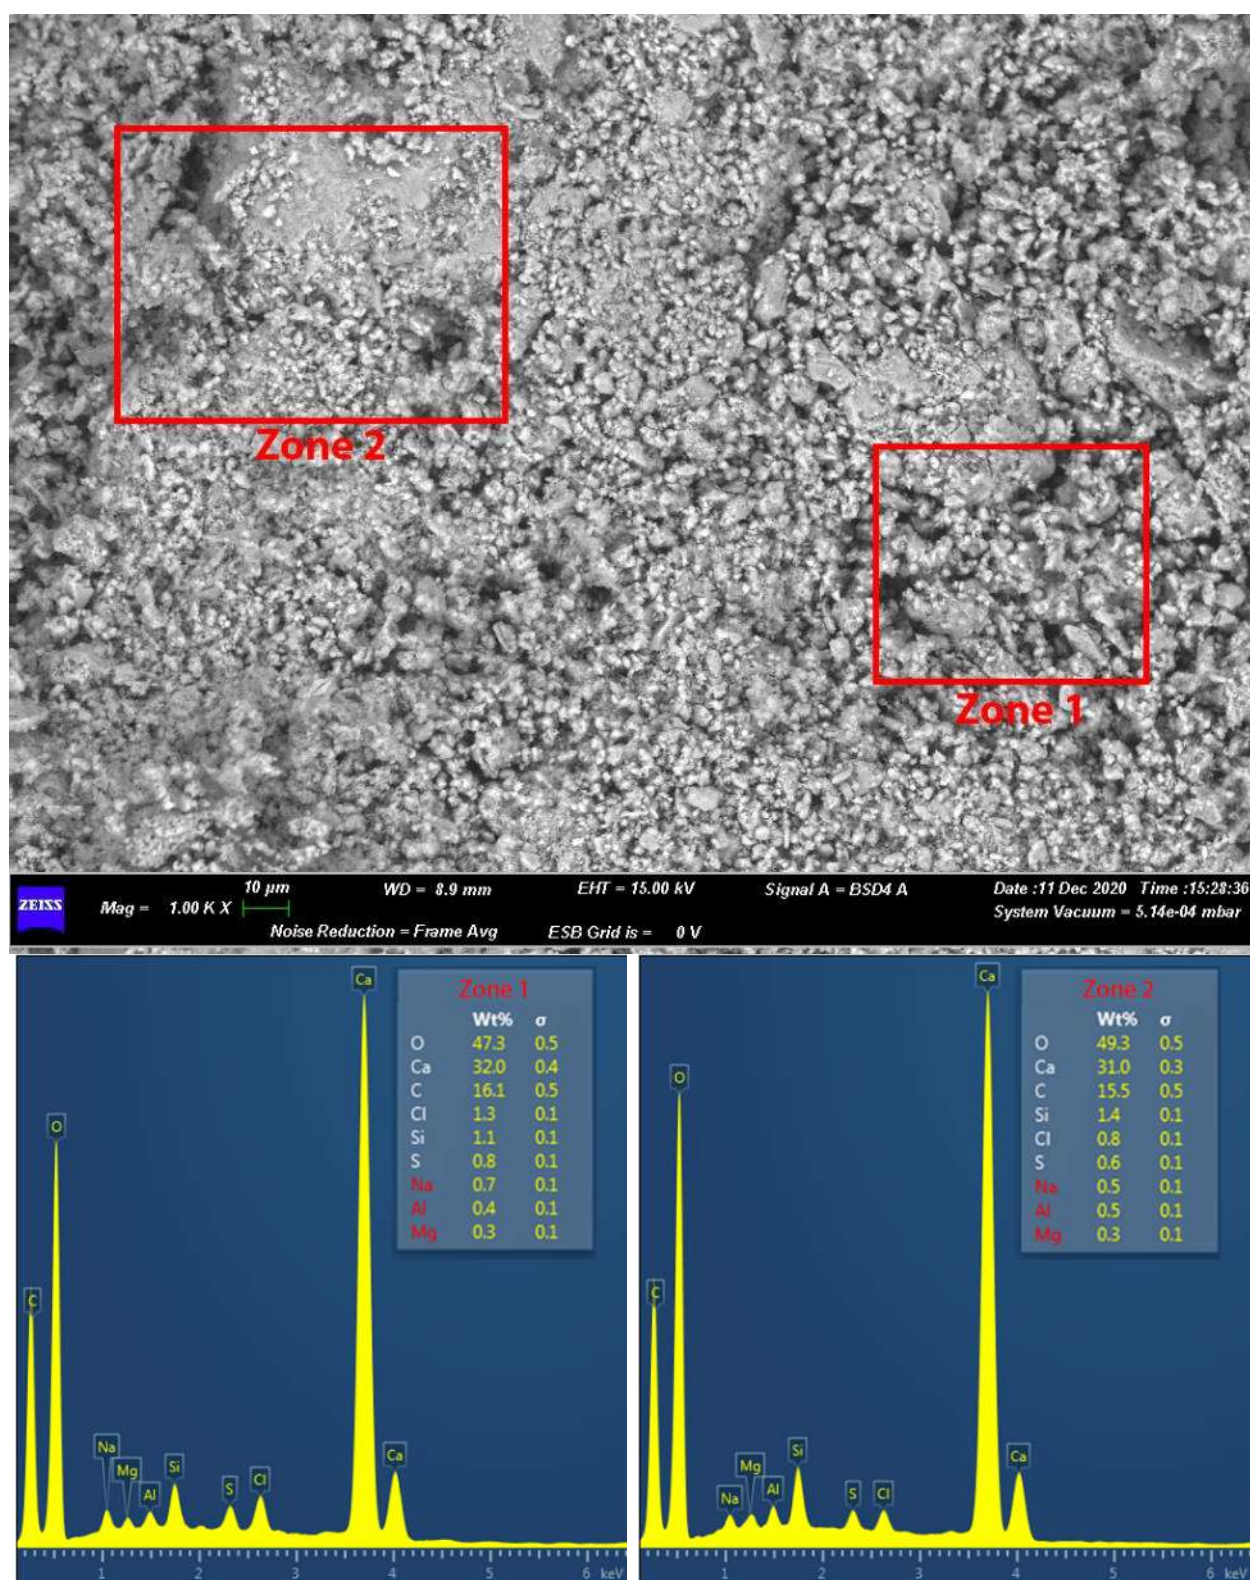

**Figure S4.** SEM images of stone materials fragments collected after cleaning treatment inside the Church of the “Madonna dei Derelitti” and EDS analysis of two selected areas.

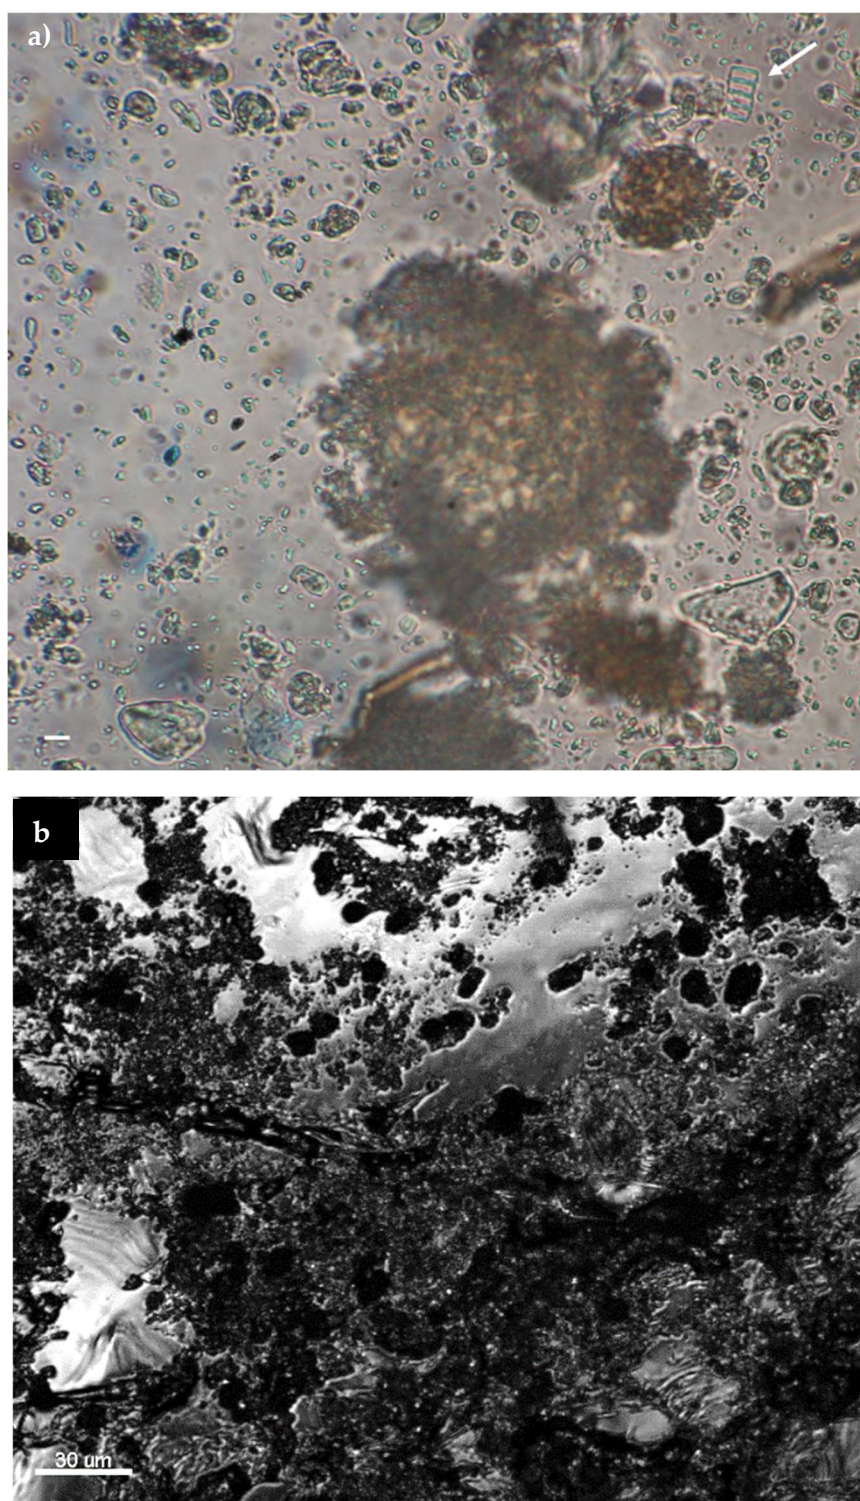

**Figure S5.** Images of samples collected at different areas of the Church of “Madonna dei Derelitti”, after the cleaning procedures obtained after observations at (a) the light microscope (bar = 5  $\mu\text{m}$ , 40 $\times$ ) and (b) CLSM. It is evident the absence of living microorganisms; mineral material and cellular debris are visible in (a) among which empty frustules of diatoms (arrow).

---

## References

1. Gómez-Ordóñez, E.; Rupérez, P. FTIR-ATR spectroscopy as a tool for polysaccharide identification in edible brown and red seaweeds. *Food Hydrocoll.* **2011**, *25*, 1514–1520; doi: 10.1016/j.foodhyd.2011.02.009.
2. Sakugawa, K.; Ikeda, A.; Takemura, A.; Ono, H. Simplified method for estimation of composition of alginates by FTIR. *J. Appl. Polym. Sci.* **2004**, *93*, 1372–1377; doi: 10.1002/app.20589.
3. Liu, Q.; Hedberg, E.L.; Liu, Z.; Bahulekar, R.; Meszlenyi, R.K.; Mikos, A.G. Preparation of macroporous poly(2-hydroxyethyl methacrylate) hydrogels by enhanced phase separation. *Biomaterials* **2000**, *21*, 2163–2169; doi: 10.1016/S0142-9612(00)00137-X
4. Bonelli, N.; Poggi, G.; Chelazzi, D.; Giorgi, R.; Baglioni P. Poly(vinyl alcohol)/poly(vinyl pyrrolidone) hydrogels for the cleaning of art. *J. Colloid Interface Sci.* **2019**, *536*, 339–348; doi: 10.1016/j.jcis.2018.10.025
